# Supplementary material for: Metabolomic Profiling to Identify Molecular Biomarkers of Cellular Response to Methotrexate In Vitro
Source: PubMed Central journal article supplement — Clin Transl Sci. 2019 Oct 25;13(1):137–46. doi: 10.1111/cts.12694 (PMC6951846; doi:10.1111/cts.12694), 2019-10-25
Supplement: CTS-13-137-s002.pdf [file CTS-13-137-s002.pdf]

|                                               |                                                                                                                            |                                             |
|-----------------------------------------------|----------------------------------------------------------------------------------------------------------------------------|---------------------------------------------|
| <b>West Coast<br/>Metabolomics<br/>Center</b> | <b>SOP<br/>Standard Operating Procedure</b>                                                                                | <b>page 1 of 3</b>                          |
| <b>date: 2/25/2019</b>                        | <b>Sample preparation of blood plasma or serum samples for Lipidomic, Biogenic Amine, and Primary Metabolomic Analysis</b> | Code no.:<br>blood-LCGCextract-<br>02252019 |

|                                              |                                                                                    |
|----------------------------------------------|------------------------------------------------------------------------------------|
| Issued: 02/25/2019<br>Valid from: 02/27/2019 | Validity area: UC Davis Genome Center, Metabolomics Core and Research Laboratories |
| Responsible: Oliver Fiehn                    | Secondary: Luis Valdiviez                                                          |
| This SOP supersedes: new                     | Approved: Oliver Fiehn                                                             |

### Sample preparation of blood plasma or serum samples for CSH, HILIC and GC analysis

#### 1. Purpose:

This SOP describes sample extraction and preparation of blood plasma or serum for lipid profiling on the CSH, and HILIC platform by liquid chromatography/ mass spectrometry (LC-MS) as well as primary metabolomics platform on GC/MS. This method is to be used when there is low sample volume for separate extractions, and when more than one platform is to be used in a project.

#### References:

Matyash V, Liebisch G, Kurzchalia TV, Shevchenko A and Schwudke D (2008) Lipid extraction by methyl-*tert*-butyl ether for high-throughput lipidomics. J Lip Res 2008, 49: 1137-1146

#### 2. Starting material:

Plasma/serum: 20 µL sample volume or aliquot

#### 3. Equipment:

- Centrifuge Eppendorf 5415 D
- Calibrated pipettes 20-200µL and 100-1000µL
- Multi-Tube Vortexer (VWR VX-2500)
- Orbital Mixing Chilling/Heating Plate (Torrey Pines Scientific Instruments)
- Speed vacuum concentration system (Labconco Centrивap cold trap)

#### 4. Chemicals:

| Product                                     | Manufacturer & Part Number |
|---------------------------------------------|----------------------------|
| Eppendorf tubes 1.5 mL, uncolored           | Eppendorf 022363204        |
| Eppendorf tubes 2 mL, uncolored             | Eppendorf 022363352        |
| Crushed ice                                 | UC Davis                   |
| Water, LC/MS Grade                          | Fisher Optima W6-4         |
| MTBE, HPLC Grade                            | Acros Organics 389050010   |
| Methanol, LC/MS Grade                       | Fisher A456-4              |
| Bioreclamation human plasma (disodium EDTA) | Bioreclamation HMPLEDTA    |
| Acetonitrile, HPLC Grade                    | Fisher Optima A955-4       |
| Iso-Propanol, HPLC Grade                    | Fisher A461-4              |

#### 5. Sample Preparation:

##### Preparation of extraction solvent

1. Combine 120 mL of chilled MeOH/QC mix with 400 mL of chilled MTBE/Cholesterol Ester 22:1 in a clean 500 mL stock bottle. Mix thoroughly by swirling or stir plate and store at -20°C until use.

\*See SOP "QC mix for LC-MS lipid analysis" for preparation of MeOH/QC mix and MTBE/Cholesterol Ester 22:1.

|                                               |                                                                                                                                    |                                             |
|-----------------------------------------------|------------------------------------------------------------------------------------------------------------------------------------|---------------------------------------------|
| <b>West Coast<br/>Metabolomics<br/>Center</b> | <b>SOP<br/>Standard Operating Procedure</b>                                                                                        | <b>page 2 of 3</b>                          |
| <b>date: 2/25/2019</b>                        | <b>Sample preparation of blood plasma or<br/>serum samples for Lipidomic, Biogenic<br/>Amine, and Primary Metabolomic Analysis</b> | Code no.:<br>blood-LCGCextract-<br>02252019 |

#### Preparation of Clean Up solvent

1. For 1 L of extraction solvent, combine 375 mL of acetonitrile, 375 mL of isopropanol, and 250 mL water in a 1 L bottle conditioned with the aforementioned chemicals. If a different total volume of extraction solvent is needed, simply mix acetonitrile, isopropanol, and water in volumes in proportion 3:3:2.
2. Purge the extraction solution mix for 5 min with nitrogen with small bubbles. Make sure that the nitrogen line is flushed out of air before using it for degassing the extraction solvent solution.
3. Store at -20°C until use. Note: if solvent freezes, sonicate until thawed and mix before use.

#### Extraction

1. Thaw raw samples/controls at room temperature (or in the refrigerator at 4°C) and either invert the tube or vortex 10 sec at **low speed** to homogenize.
2. Aliquot 20 µL of plasma sample into a 1.5 mL Eppendorf tube. Keep all samples on ice.
3. Add 975 µL ice-cold 3:10 (v/v) MeOH/MTBE + QC mix/CE 22:1 extraction solvent mixture to each aliquot, keeping the extraction solvent on ice during the procedure.
4. Vortex samples for 10 seconds, then shake for 5 minutes at 4°C on the orbital mixer.
5. Add 188 µL room temperature LC/MS grade water to each tube.
6. Vortex tubes for 20 seconds and then centrifuge for 2 min at 14,000 rcf.
7. Transfer the upper organic phase to two separate tubes (350 µL/each tube) for lipidomics analysis.
8. Transfer 75 µL of the remaining organic phase to a 2, 15, or 50 mL tube for pools, depending on number of samples in the study.
9. Transfer the bottom aqueous phase to two separate tubes (110 µL/each tube) for HILIC/GC-TOF analysis.
10. Dry down one tube from each phase by centrivap, keeping the undried tubes as backups. Store all tubes at -20°C until ready for analysis.

#### Clean up and pooling step for GC only

1. Resuspend the dried aliquot with 500 µL 3:3:2 (v/v/v) ACN:IPA:H<sub>2</sub>O (degassed as given above) and vortex for about 10 sec.
2. Centrifuge for 2 min at 14000 rcf.
3. Remove 450 µL supernatant to a clean 1.5 mL Eppendorf tube. Transfer the remainder to a 2, 15, 50 mL Tube, dependent on number of samples.
  - a. Aliquot multiple 1.9 mL portions of pool to new 2 mL Eppendorf tubes.
  - b. Centrifuge for 2 min at 14000 rcf.
  - c. Aliquot out 4x450 µL aliquots of supernatant into clean 1.5 mL Eppendorf tubes.
4. Evaporate to complete dryness in the Labconco Centrivap cold trap concentrator.
5. Submit to derivatization .

#### Pooling (CSH platform only)

1. Transfer multiple 350 µL aliquots of pooled samples to 1.5 mL Eppendorf tubes, one aliquot for every 10 samples in the study. If there is still pool remaining, prepare additional aliquots for backup.
2. Evaporate to complete dryness in the Labconco Centrivap cold trap concentrator. Store all tubes at -20°C until ready for analysis.

#### **6. Quality assurance**

- For every 10 samples, extract a method blank (20 µL of H<sub>2</sub>O) and a sample control (20 µL human Bioreclamation or analogous species plasma) in addition to samples.
- For large studies (>100 samples), for every 100 samples a NIST plasma extract should be prepared in the same manner as positive controls.

#### **7. Disposal of waste**

- Collect all chemicals in appropriate bottles and follow the disposal rules.
- Collect residual plasma/serum samples in specifically designed red 'biohazard' waste bags.

|                                               |                                                                                                                                    |                                             |
|-----------------------------------------------|------------------------------------------------------------------------------------------------------------------------------------|---------------------------------------------|
| <b>West Coast<br/>Metabolomics<br/>Center</b> | <b>SOP<br/>Standard Operating Procedure</b>                                                                                        | <b>page 3 of 3</b>                          |
| <b>date: 2/25/2019</b>                        | <b>Sample preparation of blood plasma or<br/>serum samples for Lipidomic, Biogenic<br/>Amine, and Primary Metabolomic Analysis</b> | Code no.:<br>blood-LCGCextract-<br>02252019 |

## LC Integrated Extraction

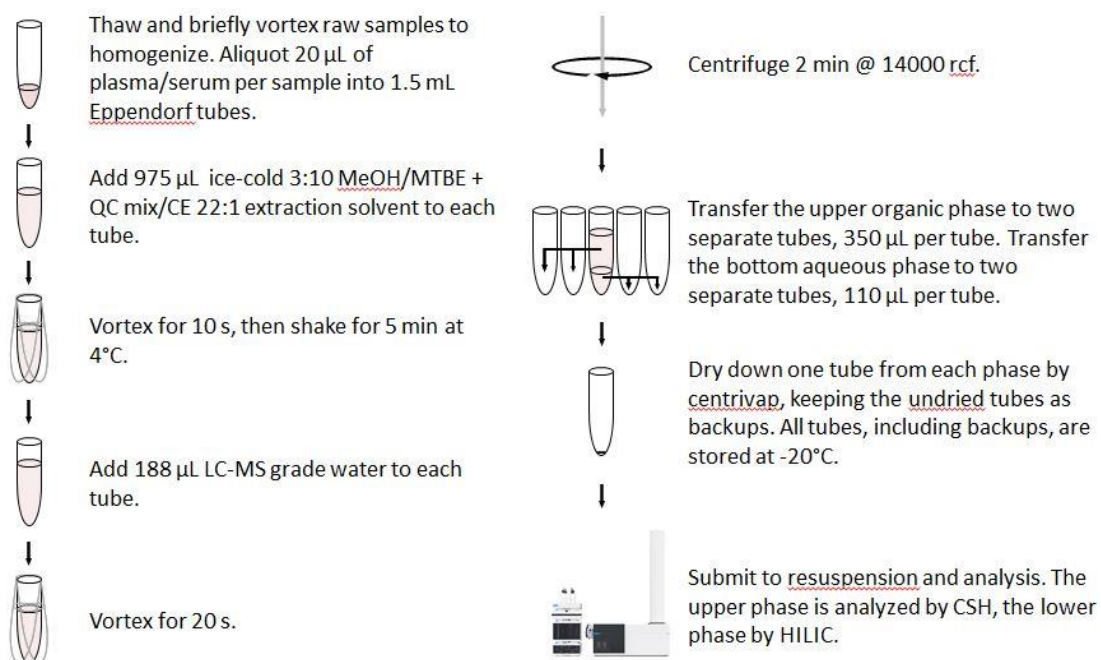

**Figure 1.** Integrated Extraction Procedure Overview
